# Supplementary material for: A new, rapid and reproducible method to obtain high quality endothelium in vitro
Source: PubMed Central journal article supplement (PMC3536875; doi:10.1007/s10616-012-9459-9), 2012-05-10
Supplement: 10616_2012_9459_MOESM2_ESM.pdf [file 10616_2012_9459_MOESM2_ESM.pdf]

**A new, rapid and reproducible method to obtain high quality endothelium *in vitro***

Cytotechnology

Nuria Jiménez, Vincent J.D. Krouwer and Jan A. Post

**HUVECs-p1: 7-days cobblestone**

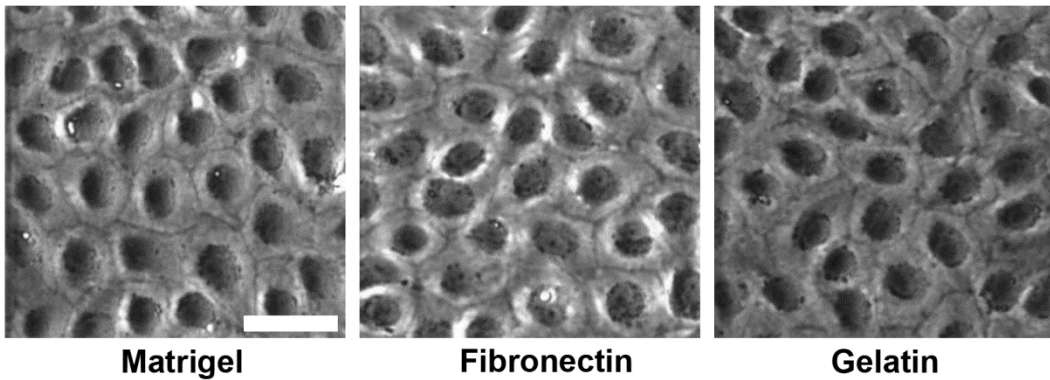

**Online Resource 2** *Phase contrast microscopy of 7-days cobblestone HUVECs on Matrigel, fibronectin and gelatin.* Cells (passage 1, p1) were seeded at 20000 cells/cm<sup>2</sup> on Aclar coated with different matrices and left to reach the 7-days cobblestone state. In all the cases, cells show distinct dark cell limits associated to the mature cobblestone appearance. Scale bar (applicable to all the panels): 50  $\mu$ m
