# Supplementary material for: A new, rapid and reproducible method to obtain high quality endothelium in vitro
Source: PubMed Central journal article supplement (PMC3536875; doi:10.1007/s10616-012-9459-9), 2012-05-10
Supplement: 10616_2012_9459_MOESM4_ESM.pdf [file 10616_2012_9459_MOESM4_ESM.pdf]

**A new, rapid and reproducible method to obtain high quality endothelium *in vitro***

Cytotechnology

Nuria Jiménez, Vincent J.D. Krouwer and Jan A. Post

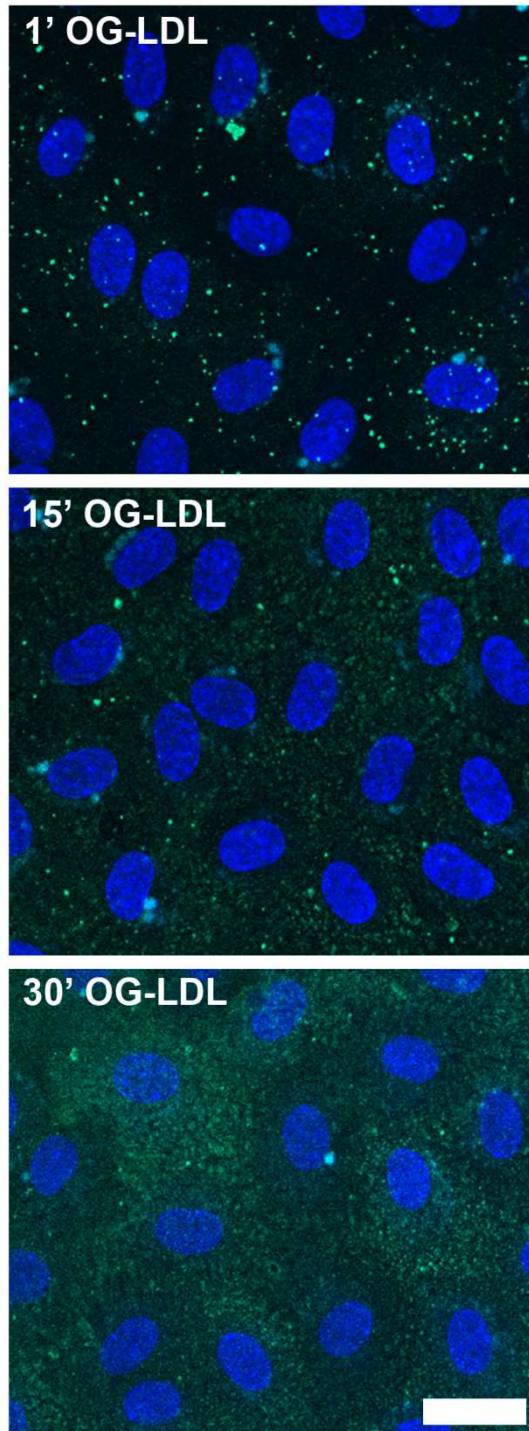

**Online Resource 4** *OG-LDL uptake by 7-days cobblestone HUVECs.* When HUVECs (passage 1) reached the 7-days cobblestone state, they were incubated with OG-LDL for 1, 15 or 30 min. After incubation cells were thoroughly washed, fixed, counterstained with DAPI and mounted with Prolong Gold. Stacks of optical slices (0.44  $\mu\text{m}$  thick) were taken by confocal laser scanning microscopy to image the whole cells. The pictures shown correspond to the most basal optical slice. HUVECs internalize OG-LDL very fast. After 1 min of incubation, OG-LDL is found in discrete points in the cytoplasm. As the incubation time progresses, a diffuse basal labeling appears and increases while the distinct OG-LDL positive structures decrease. Scale bar (applicable to all the panels): 20  $\mu\text{m}$
